# Supplementary material
Source: publisher site journal article supplement (https://www.spandidos-publications.com/5066/downloadSupplementary)
Supplement: Supplementary file 1 [file downloadSupplementary]

**Table SI. Primer sequences used for RT-qPCR in the present study.**

| Gene             | GenBank Accession no. | Primer sequences                                                                        |
|------------------|-----------------------|-----------------------------------------------------------------------------------------|
| <i>c-Myc</i>     | NM_002467             | Forward: 5'-AATGAAAAGGCCCCCAAGGTAGTTATCC-3'<br>Reverse: 5'-GTCGTTTCCGCAACAAGTCCTCTTC-3' |
| <i>p21</i>       | NM_000389             | Forward: 5'-GGCAGACCAGCATGACAGATT-3'<br>Reverse: 5'-GCGGATTAGGGCTTCCTCT-3'              |
| <i>cyclin B1</i> | NM_031966             | Forward: 5'-CGGGAAGTCACTGGAAACAT-3'<br>Reverse: 5'-AAACATGGCAGTGACACCAA-3'              |
| <i>E-cad</i>     | NM_001101             | Forward: 5'-TACACTGCCCAGGAGCCAGA-3'<br>Reverse: 5'-TGGCACCAGTGTCGGATTA-3'               |
| <i>Snail</i>     | NM_005985             | Forward: 5'-GCTGCAGGACTCTAATCCAGA-3'<br>Reverse: 5'-ATCTCCGGAGGTGGGATG-3'               |
| <i>Vimentin</i>  | NM_003380             | Forward: 5'-TGAGTACCGGAGACAGGTGCAG-3'<br>Reverse: 5'-TAGCAGCTTCAACGGCAAAGTTC-3'         |
| <i>COX-2</i>     | NM_000963             | Forward: 5'-TGAGCATCTACGGTTTGCTG-3'<br>Reverse: 5'-TGCTTGTCTGGAACAACACTGC-3'            |
| <i>ICAM-1</i>    | NM_000201             | Forward: 5'-CAAGGCCTCAGTCAGTGTGA-3'<br>Reverse: 5'-CCTCTGGCTTCGTCAGAATC-3'              |
| <i>MMP-2</i>     | NM_004530             | Forward: 5'-AGCTCCCGGAAAAGATGGATG-3'<br>Reverse: 5'-CAGGGTGCTGGCTGAGTAGAT-3'            |
| <i>MMP-9</i>     | NM_004994             | Forward: 5'-GAAGATGCTGCTGTTCAGCG-3'<br>Reverse: 5'-ACTTGGTCCACCTGGTTCAA-3'              |
| <i>β-actin</i>   | NM_001101             | Forward: 5'-GCACAGAGCCTCGCCTT-3'<br>Reverse: 5'-GTTGTCGACGACGAGCG-3'                    |

*E-cad*, E-cadherin; *COX-2*, cyclooxygenase-2; *ICAM-1*, intercellular adhesion molecule-1; *MMP*, matrix metalloproteinase.

**Table SII. Dilutions, suppliers, catalogue numbers and incubation times/temperatures of the antibodies used in the present study.**

| Antibody <sup>a</sup>                                                                                                                                                                                   | Cat. no.  | Dilution (temperature and incubation time) |
|---------------------------------------------------------------------------------------------------------------------------------------------------------------------------------------------------------|-----------|--------------------------------------------|
| Primary antibodies                                                                                                                                                                                      |           |                                            |
| p21 (21 kDa)                                                                                                                                                                                            | SC-56335  | 1:1,000 (4°C, overnight)                   |
| p53 (53 kDa)                                                                                                                                                                                            | SC-6243   | 1:1,000 (4°C, overnight)                   |
| Cyclin B1 (60 kDa)                                                                                                                                                                                      | SC-245    | 1:1,000 (4°C, overnight)                   |
| Cyclin D1 (37 kDa)                                                                                                                                                                                      | SC-718    | 1:1,000 (4°C, overnight)                   |
| ICAM-1 (110 kDa)                                                                                                                                                                                        | SC-7891   | 1:1,000 (4°C, overnight)                   |
| MMP-9 (92 kDa)                                                                                                                                                                                          | SC-12759  | 1:1,000 (4°C, overnight)                   |
| E-cad (135 kDa)                                                                                                                                                                                         | SC-21791  | 1:1,000 (4°C, overnight)                   |
| Vimentin (57 kDa)                                                                                                                                                                                       | SC-6260   | 1:1,000 (4°C, overnight)                   |
| β-actin (43 kDa)                                                                                                                                                                                        | SC-1616   | 1:7,500 (4°C, overnight)                   |
| Secondary antibodies                                                                                                                                                                                    |           |                                            |
| Goat anti-rabbit IgG-HRP                                                                                                                                                                                | SC-2030   | 1:5,000 (4°C, 3 h)                         |
| Mouse-IgGk BP-HRP                                                                                                                                                                                       | SC-516102 | 1:5,000 (4°C, 3 h)                         |
| Mouse anti-goat IgG-HRP                                                                                                                                                                                 | SC-2354   | 1:7,500 (4°C, 3 h)                         |
| <sup>a</sup> All antibodies were obtained from Santa Cruz Biotechnology, Inc. E-cad, E-cadherin; ICAM-1, intercellular adhesion molecule-1; MMP, matrix metalloproteinase; HRP, horseradish peroxidase. |           |                                            |
